# Supplementary material for: DIDA: Distributed Indexing Dispatched Alignment
Source: PubMed Central journal article supplement (PMC4414605; doi:10.1371/journal.pone.0126409), 2015-04-29
Supplement: pone.0126409.s001.pdf [file pone.0126409.s001.pdf]

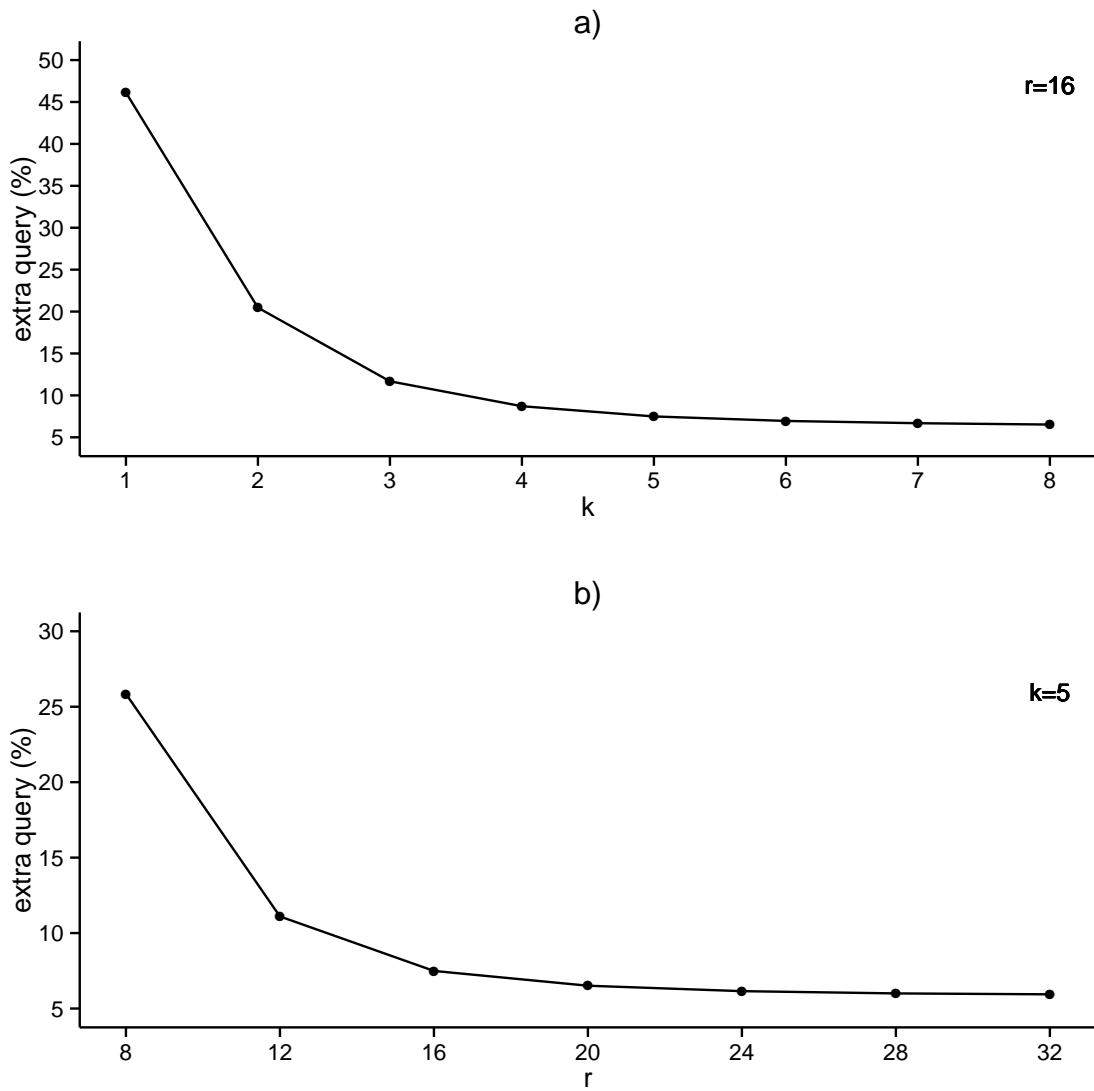

**Supplementary Figure 1.** Extra dispatched reads vs.  $r$  and  $k$ . (a) Percentage of extra dispatched reads vs. the number of hash functions,  $k$ , for the fixed value of  $r = 16$  on *C. elegans* dataset. (b) Percentage of extra dispatched reads vs. the number of bits per item,  $r$ , for the fixed value of  $k = 5$  on *C. elegans* dataset.
