# Supplementary material for: DIDA: Distributed Indexing Dispatched Alignment
Source: PubMed Central journal article supplement (PMC4414605; doi:10.1371/journal.pone.0126409), 2015-04-29

**Supplementary Text 1. Procedure for choosing  $b$ -mer length, and BF loading and querying**

**Loading Bloom filter.** In this stage, all target sequences in the target set  $T = \{T_1, T_2, \dots\}$  are scanned using a sliding substring of length  $b$  which is called  $b$ -mer. For each target sequence  $T_i$ , all possible  $|T_i| - b + 1$   $b$ -mers are scanned and then inserted to the Bloom filter after specifying the corresponding bit vector positions by computing the  $k$  hash values for each  $b$ -mer.

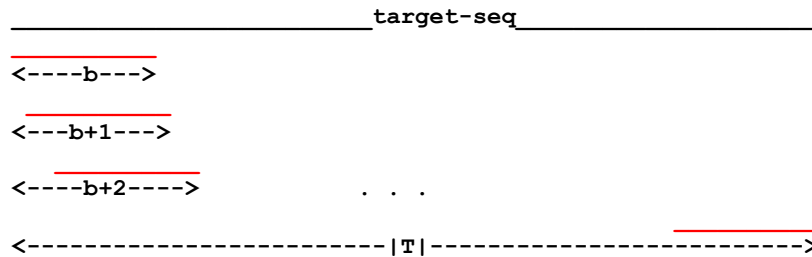

**Querying Bloom filter.** In this step, all reads in the read set  $R = \{R_1, R_2, \dots\}$  are queried using the same  $b$ -mer in the loading stage. If at least one hit is found for a read, the read is dispatched to the corresponding node. We can use sliding  $b$ -mer windows (with step size of one base,  $s = 1$ ) or jumping  $b$ -mer windows (with step size greater than one base) to interrogate each read  $R_j$  as explained below.

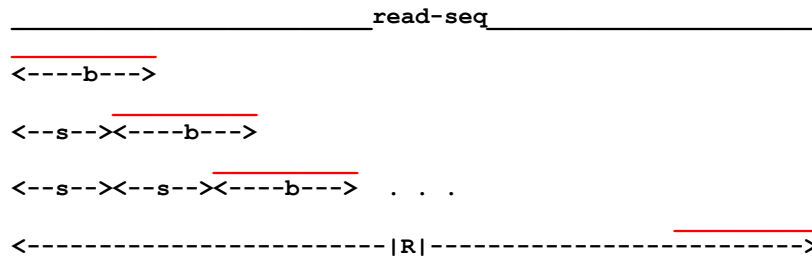

Suppose that the minimum seed or exact match length to report a candidate hit for an aligner is  $l$ . We choose  $b \leq l$  and then load the Bloom filters as mentioned in the *Loading Bloom filter* stage. In the querying stage, the  $b$ -mers of each read sequence is interrogated against all Bloom filters from different partitions. If  $b = l$ , the reads are scanned using sliding window with step size of one base, i.e.  $s = 1$ . By choosing  $b < l$ , the interrogation step will be faster but with more extra dispatched reads, and the step size is computed as follows to cover all possible seeds or exact matches of length  $l$  between the target sequence  $T_i$  and read sequence  $R_j$ . If the  $l$ -mer starting at position  $p$  is covered by at least one  $b$ -mer, to cover the next  $l$ -mer starting at position  $p + 1$  we should have  $s + b \leq l + 1$ . Therefore,  $s \leq l - b + 1$ .

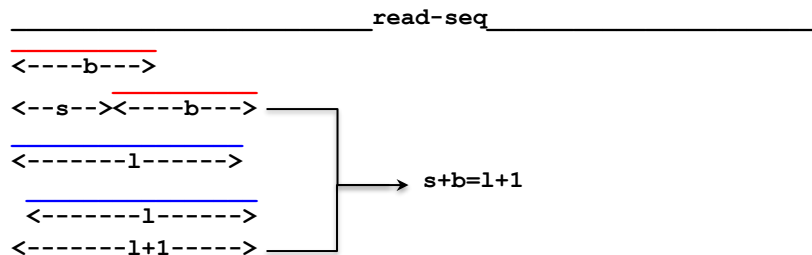

Supplement: pone.0126409.s002.pdf [file pone.0126409.s002.pdf]
