# Supplementary material for: DIDA: Distributed Indexing Dispatched Alignment
Source: PubMed Central journal article supplement (PMC4414605; doi:10.1371/journal.pone.0126409), 2015-04-29
Supplement: pone.0126409.s005.pdf [file pone.0126409.s005.pdf]

**Supplementary Table 1. DIDA algorithm pseudo code.**

```

1: Input: Set  $T$  of target sequences, set  $Q$  of query sequences
2: procedure DISTRIBUTE
3:    $comp \leftarrow \text{dfs}(T)$  ▷ identifying connected components
4:    $comp_{sorted} \leftarrow \text{qsort}(comp)$  ▷ sorting connected components
5:    $P \leftarrow \text{best-fit-decreasing}(comp_{sorted})$  ▷ partitioning sorted connected components
6: procedure INDEX
7:   for all  $p \in P$  in parallel do
8:      $index_p \leftarrow \text{build-index}(p)$  ▷ constructing index for each partition
9:      $\text{store-index}(index_p)$  ▷ storing index for alignment step
10: procedure DISPATCH
11:   for all  $p \in P$  in parallel do ▷ loading Bloom filter for each partition
12:     for all  $t \in p$  do
13:       for all  $b\text{-mer} \in t$  do
14:          $\text{insert}(b\text{-mer}, BF[p])$ 
15:   for all  $q \in Q$  do ▷ flowing queries through partitions
16:     for all  $p \in P$  in parallel do
17:       if  $\text{contain}(b\text{-mer} \in q, BF[p])$  then
18:          $\text{dispatch}(q, node_p)$ 
19: procedure ALIGN
20:   for all  $p \in P$  in parallel do ▷ aligning queries against targets on all partitions
21:      $\text{receive}(q, node_p)$ 
22:      $s \leftarrow \text{align}(q, index_p)$ 
23:      $\text{send}(s, node_{merger})$ 
24: procedure MERGE
25:   while  $\text{receive}(s, node_i)$  in parallel do ▷ merging results from all partitions
26:      $\text{insert}(s, \text{priority-queue})$ 
27:      $s \leftarrow \text{priority-queue.pop}()$ 
28:      $\text{write}(s, samFile)$ 
29: Output: File samFile

```
