# Supplementary material for: DIDA: Distributed Indexing Dispatched Alignment
Source: PubMed Central journal article supplement (PMC4414605; doi:10.1371/journal.pone.0126409), 2015-04-29
Supplement: pone.0126409.s006.pdf [file pone.0126409.s006.pdf]

**Supplementary Table 2.** Exact numbers for *C. elegans* dataset - Fig. 2 in main text.

|         | time<br>(sec) | mem<br>(MB) | time<br>(sec) | mem<br>(MB) | time<br>(sec) | mem<br>(MB) | time<br>(sec) | mem<br>(MB) |
|---------|---------------|-------------|---------------|-------------|---------------|-------------|---------------|-------------|
| 1-node  |               |             |               |             |               |             |               |             |
|         | amap          |             | bwa           |             | bowtie        |             | novoalign     |             |
| ind     | 30            | 1100        | 111           | 156         | 159           | 274         | 23            | 589         |
| aln     | 2124          | 147         | 834           | 1400        | 1541          | 344         | 19648         | 554         |
| total   | 2154          | 1100        | 945           | 156         | 1700          | 274         | 19671         | 589         |
| 2-node  |               |             |               |             |               |             |               |             |
|         | amap          |             | bwa           |             | bowtie        |             | novoalign     |             |
| prt     | 1             | 16          | 1             | 16          | 1             | 16          | 1             | 16          |
| ind     | 13            | 522         | 46            | 80          | 83            | 163         | 10            | 263         |
| dsp     | 376           | 96          | 376           | 96          | 376           | 96          | 376           | 96          |
| aln     | 875           | 73          | 281           | 842         | 628           | 248         | 5919          | 275         |
| mrg     | 9             | 4           | 9             | 4           | 9             | 4           | 9             | 4           |
| total   | 1261          | 522         | 667           | 80          | 1014          | 163         | 6305          | 263         |
| 4-node  |               |             |               |             |               |             |               |             |
|         | amap          |             | bwa           |             | bowtie        |             | novoalign     |             |
| prt     | 1             | 16          | 1             | 16          | 1             | 16          | 1             | 16          |
| ind     | 6             | 238         | 21            | 65          | 35            | 99          | 6             | 151         |
| dsp     | 381           | 97          | 381           | 97          | 381           | 97          | 381           | 97          |
| aln     | 491           | 39          | 172           | 804         | 335           | 217         | 4782          | 163         |
| mrg     | 20            | 4           | 20            | 4           | 20            | 4           | 20            | 4           |
| total   | 893           | 238         | 574           | 65          | 737           | 99          | 5184          | 151         |
| 8-node  |               |             |               |             |               |             |               |             |
|         | amap          |             | bwa           |             | bowtie        |             | novoalign     |             |
| prt     | 1             | 16          | 1             | 16          | 1             | 16          | 1             | 16          |
| ind     | 3             | 120         | 8             | 134         | 15            | 62          | 3             | 69          |
| dsp     | 383           | 97          | 383           | 97          | 383           | 97          | 383           | 97          |
| aln     | 296           | 21          | 99            | 784         | 168           | 195         | 4361          | 94          |
| mrg     | 43            | 4           | 43            | 4           | 43            | 4           | 43            | 4           |
| total   | 723           | 120         | 526           | 134         | 595           | 62          | 4788          | 69          |
| 12-node |               |             |               |             |               |             |               |             |
|         | amap          |             | bwa           |             | bowtie        |             | novoalign     |             |
| prt     | 1             | 16          | 1             | 16          | 1             | 16          | 1             | 16          |
| ind     | 2             | 81          | 5             | 89          | 9             | 46          | 2             | 50          |
| dsp     | 391           | 97          | 391           | 97          | 391           | 97          | 391           | 97          |
| aln     | 249           | 16          | 96            | 783         | 150           | 190         | 4013          | 72          |
| mrg     | 59            | 4           | 59            | 4           | 59            | 4           | 59            | 4           |
| total   | 700           | 81          | 547           | 89          | 601           | 46          | 4464          | 50          |
