# Supplementary material for: DIDA: Distributed Indexing Dispatched Alignment
Source: PubMed Central journal article supplement (PMC4414605; doi:10.1371/journal.pone.0126409), 2015-04-29
Supplement: pone.0126409.s007.pdf [file pone.0126409.s007.pdf]

**Supplementary Table 3.** Exact numbers for human draft assembly dataset - Fig. 3 in main text.

|         | time<br>(min) | mem<br>(MB) | time<br>(min) | mem<br>(MB) | time<br>(min) | mem<br>(MB) | time<br>(min) | mem<br>(MB) |
|---------|---------------|-------------|---------------|-------------|---------------|-------------|---------------|-------------|
| 1-node  |               |             |               |             |               |             |               |             |
|         | amap          |             | bwa           |             | bowtie        |             | novoalign     |             |
| ind     | 22            | 31000       | 73            | 4400        | 131           | 6100        | 8             | 9300        |
| aln     | 630           | 4200        | 334           | 7100        | 1043          | 5300        | 59117         | 2600        |
| total   | 652           | 31000       | 407           | 4400        | 1174          | 6100        | 59125         | 9300        |
| 2-node  |               |             |               |             |               |             |               |             |
|         | amap          |             | bwa           |             | bowtie        |             | novoalign     |             |
| prt     | 1             | 691         | 1             | 691         | 1             | 691         | 1             | 691         |
| ind     | 9             | 15000       | 32            | 2200        | 54            | 2900        | 3             | 4100        |
| dsp     | 100           | 2600        | 100           | 2600        | 100           | 2600        | 100           | 2600        |
| aln     | 363           |             | 145           |             | 502           |             | 35619         |             |
| mrg     | 8             | 12          | 8             | 12          | 8             | 12          | 8             | 12          |
| total   | 472           | 15000       | 254           | 2200        | 611           | 2900        | 35728         | 4100        |
| 4-node  |               |             |               |             |               |             |               |             |
|         | amap          |             | bwa           |             | bowtie        |             | novoalign     |             |
| prt     | 1             | 691         | 1             | 691         | 1             | 691         | 1             | 691         |
| ind     | 4             | 8100        | 14            | 1100        | 29            | 1600        | 3             | 3700        |
| dsp     | 101           | 2600        | 101           | 2600        | 101           | 2600        | 101           | 2600        |
| aln     | 232           | 1510        | 105           | 2900        | 382           | 2300        | 23200         | 3500        |
| mrg     | 9             | 12          | 9             | 12          | 9             | 12          | 9             | 12          |
| total   | 343           | 8100        | 216           | 1100        | 493           | 1600        | 23311         | 3700        |
| 8-node  |               |             |               |             |               |             |               |             |
|         | amap          |             | bwa           |             | bowtie        |             | novoalign     |             |
| prt     | 1             | 691         | 1             | 691         | 1             | 691         | 1             | 691         |
| ind     | 2             | 4100        | 7             | 559         | 13            | 977         | 2             | 2100        |
| dsp     | 102           | 3300        | 102           | 3300        | 102           | 3300        | 102           | 3300        |
| aln     | 130           | 387         | 68            | 1980        | 248           | 1660        | 17362         | 3100        |
| mrg     | 20            | 12          | 20            | 12          | 20            | 12          | 20            | 12          |
| total   | 253           | 4100        | 191           | 559         | 371           | 977         | 17485         | 2100        |
| 12-node |               |             |               |             |               |             |               |             |
|         | amap          |             | bwa           |             | bowtie        |             | novoalign     |             |
| prt     | 1             | 691         | 1             | 691         | 1             | 691         | 1             | 691         |
| ind     | 2             | 2700        | 5             | 372         | 8             | 590         | 1             | 1200        |
| dsp     | 104           | 2600        | 104           | 2600        | 104           | 2600        | 104           | 2600        |
| aln     | 81            | 387         | 47            | 1500        | 162           | 696         | 13007         | 2400        |
| mrg     | 23            | 12          | 23            | 12          | 23            | 12          | 23            | 12          |
| total   | 210           | 2700        | 181           | 372         | 296           | 590         | 13141         | 1200        |
