# Supplementary material for: DIDA: Distributed Indexing Dispatched Alignment
Source: PubMed Central journal article supplement (PMC4414605; doi:10.1371/journal.pone.0126409), 2015-04-29
Supplement: pone.0126409.s008.pdf [file pone.0126409.s008.pdf]

**Supplementary Table 4.** Exact numbers for human reference genome (hg19) dataset.

|         | time<br>(min) | mem<br>(MB) | time<br>(min) | mem<br>(MB) | time<br>(min) | mem<br>(MB) |
|---------|---------------|-------------|---------------|-------------|---------------|-------------|
| 1-node  |               |             |               |             |               |             |
|         | amap          |             | bwa           |             | bowtie        |             |
| ind     | 21            | 33823       | 76            | 4709        | 129           | 5528        |
| aln     | 423           |             | 303           |             | 867           |             |
| total   | 444           | 33823       | 379           | 4709        | 996           | 5528        |
| 2-node  |               |             |               |             |               |             |
|         | amap          |             | bwa           |             | bowtie        |             |
| prt     | 1             |             | 1             |             | 1             |             |
| ind     | 8             | 16911       | 33            | 2354        | 67            | 3042        |
| dsp     | 103           |             | 103           |             | 103           |             |
| aln     | 212           |             | 143           |             | 401           |             |
| mrg     | 7             |             | 7             |             | 7             |             |
| total   | 323           | 16911       | 254           | 2354        | 512           | 3042        |
| 4-node  |               |             |               |             |               |             |
|         | amap          |             | bwa           |             | bowtie        |             |
| prt     | 1             |             | 1             |             | 1             |             |
| ind     | 3             | 8455        | 15            | 1177        | 26            | 1417        |
| dsp     | 99            |             | 99            |             | 99            |             |
| aln     | 123           |             | 96            |             | 243           |             |
| mrg     | 9             |             | 9             |             | 9             |             |
| total   | 232           | 8455        | 205           | 1177        | 352           | 1417        |
| 8-node  |               |             |               |             |               |             |
|         | amap          |             | bwa           |             | bowtie        |             |
| prt     | 1             |             | 1             |             | 1             |             |
| ind     | 2             | 4227        | 7             | 588         | 11            | 667         |
| dsp     | 93            |             | 93            |             | 93            |             |
| aln     | 63            |             | 61            |             | 144           |             |
| mrg     | 16            |             | 16            |             | 16            |             |
| total   | 173           | 4227        | 171           | 588         | 254           | 667         |
| 12-node |               |             |               |             |               |             |
|         | amap          |             | bwa           |             | bowtie        |             |
| prt     | 1             |             | 1             |             | 1             |             |
| ind     | 1             | 3170        | 5             | 441         | 7             | 495         |
| dsp     | 94            |             | 94            |             | 94            |             |
| aln     | 46            |             | 50            |             | 112           |             |
| mrg     | 19            |             | 19            |             | 19            |             |
| total   | 160           | 3170        | 164           | 441         | 226           | 495         |
