# Supplementary material for: DIDA: Distributed Indexing Dispatched Alignment
Source: PubMed Central journal article supplement (PMC4414605; doi:10.1371/journal.pone.0126409), 2015-04-29
Supplement: pone.0126409.s009.pdf [file pone.0126409.s009.pdf]

**Supplementary Table 5.** Exact numbers for *Picea glauca* dataset.

|       | 2-node        |             | 4-node        |             | 8-node        |             | 12-node       |             |
|-------|---------------|-------------|---------------|-------------|---------------|-------------|---------------|-------------|
|       | time<br>(min) | mem<br>(GB) | time<br>(min) | mem<br>(GB) | time<br>(min) | mem<br>(GB) | time<br>(min) | mem<br>(GB) |
| prt   | 10            |             | 10            |             | 10            |             | 10            |             |
| ind   | 207           | 184         | 68            | 81          | 28            | 45          | 17            | 31          |
| dsp   | 341           |             | 210           |             | 164           |             | 161           |             |
| aln   | 829           |             | 584           |             | 438           |             | 370           |             |
| mrg   | 22            |             | 24            |             | 27            |             | 34            |             |
| total | 1201          | 184         | 827           | 81          | 638           | 45          | 574           | 31          |
